# Supplementary material for: Securing the Future of AHP Research: Mapping UK Practitioner-Academic/Clinical-Academic Roles and Sustainability
Source: Research Square preprint supplement (doi:10.21203/rs.3.rs-6984457/v1), 2025-08-07
Supplement: Supplementary file 1 [file 7449efb3f8cbeaa4cdb26565.pdf]

# Mapping the UK AHP Practitioner-Academic / Clinical-Academic Workforce Survey 2025

---

## Introduction

Thank you for considering completing the Mapping the UK AHP Practitioner-Academic / Clinical-Academic Workforce Survey 2025. This survey has been developed as part of the Community for Allied Health Professions Research (CAHPR) Accelerator Project 2024 (CAP24). The survey is being hosted by Royal College of Occupational Therapists (RCOT) on behalf of CAHPR.

Completion of this survey is anonymous, and the results will not be linked back to you in any way. The survey will take approximately 10 - 15 minutes to complete. You can save progress and complete the survey in multiple sessions. You are free to withdraw from completing the survey any time before you submit your responses. Only submitted responses will be analysed.

Through this survey we aim to generate accurate intelligence of the AHP Practitioner-Academic (Clinical-Academic) workforce across the UK.

We aim to collect data for; i) AHPs with formal practitioner-academic / clinical-academic appointments, and ii) AHPs with dedicated research time as part of their role. Therefore, the survey is open to responses from UK registered AHP practitioners who have dedicated research time as part, or all, of their current role.

We have chosen to use the term 'practitioner-academic' throughout this survey (with the above description clearly defining who the target population is). This is because the term 'practitioner-academic' inclusively captures the breath of our AHP workforce and the settings AHPs work in, whether or not they have the title clinical academic. As the term 'clinical-academic' is widely recognised, it is used in the survey title and introduction for context.

What is dedicated research time?

The term dedicated research time is used throughout this survey. This relates to all research activities, including but not limited to: Undertaking a research fellowship award, undertaking or leading research, supporting the delivery of research, research capacity building, developing research leadership in others, research mentoring and supervising research students. **Please note for the purposes of this survey, we are not including the following as research activities: Audits, quality improvement projects, service development and evaluation projects (unless under research protocol).**

## Diversity data

There are a number of questions at the end of this survey to collect diversity data. Completion of this section is optional. We collect diversity data because it helps to identify and remove barriers to inclusion, for example, by exploring areas of under-representation of specific groups of people. All diversity data collected is anonymous and will not be linked back to you in any way.

## Governance

This project has been reviewed and approval given through RCOT project governance process, reference number PE123/24. If you have any questions or feedback about the survey please contact [jennifer.sutton@rcot.co.uk](mailto:jennifer.sutton@rcot.co.uk).

Survey closes on: 09 February 2025

## Privacy Statement

This survey is run through the Online Surveys JISC Mail service. JISC is responsible for maintaining the security of the operating system used to provide online surveys and the JISC Online Surveys Security Policy applies (available at Security – Online Surveys ([jisc.ac.uk](https://www.jisc.ac.uk))).

This survey is being hosted by the Royal College of Occupational Therapists (RCOT) on behalf of the Community for Allied Health Professions Research (CAHPR). RCOT is the data controller for the information you provide in the context of this survey and data will be processed by RCOT on behalf of CAHPR. Data collected will be stored by RCOT. The data is owned by CAHPR.

You as an individual have the right to decide whether to participate in this survey. All information collected will be anonymous in the survey. Your data will be viewed only by the project team. By logging in to the JISC platform personal data in the context of UKGDPR will be processed by JISC to log users onto the site, session cookies and a unique identifier (UID) will be processed to manage the experience. All responses are anonymous to protect so far as possible any potential for individuals to be identified by the project team in the analysis. All respondents will be anonymous in the published results.

Data will be processed through the JISC survey software and will be securely exported and analysed by RCOT on behalf of CAHPR. Data should be kept intact for any legally specified period and otherwise for three years at least, subject to any legal, ethical, or other requirements, from the end of the project. Data will be kept in a form that would enable retrieval by a third party, subject to limitations imposed by legislation and general principles of confidentiality. Data will be destroyed in accordance with the Royal College of Occupational Therapists Data Retention and Destruction Policy (2021).

The RCOT Privacy Policy can be viewed at <https://www.rcot.co.uk/privacy-policy>. For more details, including the right to lodge a complaint with the Information Commissioner's Office, please visit [www.ico.org.uk](https://www.ico.org.uk).

## Screening Questions

1. I confirm that I have read the above privacy statement and agree to continue with this survey \*

☐ Yes

☐ No

2. I confirm that I am a AHP practitioner registered to practice in the UK \*

☐ Yes

☐ No

3. I confirm that I have dedicated/agreed research time as part, or all, of my current role(s) \*

☐ Yes

☐ No

# Create a personalised code

To anonymously track responses to our survey and compare it to future surveys, please answer the following three memorable questions to create a unique personal code. You will generate your code the same way in future surveys, so it will stay the same. This will help us to track how our survey respondents and practitioner - academic workforce are changing over time and create a really useful set of data.

4. Answer the following three questions and create a personal and anonymous six character code:

What are:

- 1. The last two letters of your mother's maiden name?
- 2. Two digits of your birth month?
- 3. The last two letters of your place of birth?

Example: Smith, 01, Manchester = th01er Please type your six character code using lower case:

5. Please select your registered AHP role(s)

*(please select all that apply) \**

- ☐ Art therapist
- ☐ Dietitian
- ☐ Dramatherapist
- ☐ Music therapist
- ☐ Occupational therapist
- ☐ Operating department practitioner
- ☐ Orthoptist
- ☐ Orthotist
- ☐ Osteopath
- ☐ Paramedic
- ☐ Physiotherapist
- ☐ Podiatrist
- ☐ Prosthetist
- ☐ Radiographer - Diagnostic
- ☐ Radiographer - Therapeutic
- ☐ Speech and language therapist

6. If you have selected more than one AHP discipline, please specify your job role below:

7. How long have you been a registered AHP? \*

- ☐ Less than one year
- ☐ 1 - 4 years
- ☐ 5- 9 years
- ☐ 10 - 19 years
- ☐ 20 - 29 years

☐ 30+ years

**8. In total, across your career to date, how long have you been engaged in research activities? \***

☐ Less than one year

☐ 1 - 4 years

☐ 5- 9 years

☐ 10 - 19 years

☐ 20 - 29 years

☐ 30+ years

**9. What is your highest level of qualification? \***

☐ Diploma

☐ Degree level apprenticeship

☐ Bachelor's degree

☐ Post Graduate Certificate (PGC, PGCE)

☐ Post graduate diploma

☐ Pre-registration Master's degree

☐ Taught Master's degree (e.g. MA, MEd, MSc)

☐ Research Master's degree (MRes)

☐ Master of Philosophy (MPhil)

☐ Clinical doctorate

☐ Doctor of Philosophy (PhD)

☐ Professional doctorate (Prof.Doc)

☐ Other

**10. If other, please specify:**

11. In which geographical region\* are you employed?

*\* these options reflect CAHPR's regional consortium \**

- ☐ Cymru (Wales)
- ☐ England: North East
- ☐ England: North West
- ☐ England: Midlands
- ☐ England: East of England
- ☐ England: Central
- ☐ England: London
- ☐ England: South East
- ☐ England: South Central
- ☐ England: South West
- ☐ Northern Ireland
- ☐ Scotland
- ☐ Other (e.g. national role) - please specify below

12. If other please specify:

13. Are you employed in a practitioner-academic role with a formal joint funded appointment between any practitioner setting/sector (e.g. health or social care provider, third sector) and an academic institution?

*For your formal joint funded appointment, you may have one substantive employer and an honorary employer that together cover the entirety of your practitioner-academic role. \**

- ☐ Yes - I am employed in a practitioner-academic role with a formal joint funded appointment between any practitioner sector/setting and an academic institution
- ☐ No - I am a practitioner with an honorary appointment with an academic institution
- ☐ No - I am employed by an academic institution with an honorary appointment in a practice setting



- ☐ No - I am a research active practitioner without a formal or honorary appointment with an academic institution

**14. Which organisation hosts your practitioner-academic contract?**

- ☐ Any practitioner sector/setting (e.g. Health or social care provider, third sector)
- ☐ Academic institution
- ☐ Other

**15. If other, please specify:**

**16. Are you employed as a practitioner-academic on a full time or part time basis?**

- ☐ Full time
- ☐ Part time

**17. If part time, please specify the whole time equivalent for your role (e.g. 0.5)**

- ☐ 0.1
- ☐ 0.2
- ☐ 0.3
- ☐ 0.4
- ☐ 0.5
- ☐ 0.6
- ☐ 0.7
- ☐ 0.8
- ☐ 0.9

**18. How is your practitioner-academic role funded (e.g. via a fellowship)?**

19. Are you provided with the opportunity for joint appraisals with your host and honorary employer?

☐ Yes

☐ No

20. Are you provided with the opportunity for joint supervision sessions with your host and honorary employer?

☐ Yes

☐ No

**21. If you are not in a formal joint funded practitioner-academic role, which of the following best describes how you combine practice with research?**

- ☐ I am employed in a practitioner-academic role with an honorary appointment with an academic institution
- ☐ I am employed in a academic-practitioner role with an honorary appointment with a practice provider
- ☐ I am employed as an AHP practitioner, and I have clearly designated research time within this role
- ☐ I am employed in a research role, and I have clearly designated practitioner time within this role
- ☐ I have two (or more) separate roles with separate contracts (e.g. one practitioner, one research)
- ☐ I am employed as an educator in an academic institution and have dedicated research time in my contract
- ☐ I am undertaking a research fellowship award
- ☐ Other

**22. If other, please specify:**

**23. Are you employed on a full time or part time basis?**

- ☐ I have one full time role
- ☐ I have one part time role
- ☐ I have two or more part time roles

**24. If part time, please specify the overall whole time equivalent for your role(s) across the week (e.g. 0.5)**

- ☐ 0.1
- ☐ 0.2
- ☐ 0.3
- ☐ 0.4
- ☐ 0.5
- ☐ 0.6

- ☐ 0.7
- ☐ 0.8
- ☐ 0.9

25. How is your research time funded (e.g. via a fellowship)?

26. Is your research time affiliated with a university school/department/unit which delivers **Allied Health Profession** programme(s)?

- ☐ Yes
- ☐ No

27. Please list your main area(s) of research specialism (e.g. stroke rehabilitation). You may list up to three. \*

28. What best describes your current level of practice in your work sector (please select all that apply)? \*

- ☐ Entry practitioner / newly qualified practitioner
- ☐ Enhanced practitioner / senior practitioner
- ☐ Advanced practitioner
- ☐ Consultant practitioner
- ☐ Managerial role (e.g. team/service lead)
- ☐ Leadership role (e.g. lead clinical academic for AHPs)
- ☐ Other

29. If other, please specify:

30. What best describes your current research role (please select all that apply)? \*

- ☐ Pre-doctoral researcher
- ☐ Research assistant
- ☐ Research associate
- ☐ Research fellow
- ☐ Doctoral researcher
- ☐ Post doctoral researcher
- ☐ Chief investigator
- ☐ Associate principal investigator
- ☐ Principal investigator
- ☐ Lecturer: Senior
- ☐ Lecturer: Principal
- ☐ Lecturer: Reader

- ☐ Professor
- ☐ Associate professor
- ☐ AHP researcher role (e.g. research occupational therapist)
- ☐ Research capacity and capabilities building role
- ☐ Research delivery role
- ☐ Other

31. If other, please specify:

32. What research activities do you undertake (please select all that apply)? \*

- ☐ Undertaking or leading research - commercial studies (studies with a commercial sponsor/funding)
- ☐ Undertaking or leading research – clinical/practice-based studies, multi-site
- ☐ Undertaking or leading research – clinical/practice-based studies, single-site
- ☐ Undertaking or leading research on professional education, professional practice, or related scientific knowledge base for AHP practice
- ☐ Supporting the delivery of research
- ☐ Coordinating research studies
- ☐ Research capacity building
- ☐ Developing research leadership in others
- ☐ Research mentoring
- ☐ Supervising research students
- ☐ Other (please specify)

33. If other, please specify:

34. What percentage of your total contracted hours are dedicated to research (e.g. if your time is split 50:50 research and practitioner then you would select 50%). Please select the nearest percentage. \*

- ☐ Less than 10%
- ☐ 10%
- ☐ 20%
- ☐ 30%
- ☐ 40%
- ☐ 50%
- ☐ 60%
- ☐ 70%
- ☐ 80%
- ☐ 90% or more

**35. How protected is your research time? \***

- ☐ Protected (I am almost always able to complete research activities in my allocated research time)
- ☐ Somewhat protected (I am mostly able to complete research activities in my allocated research time, with some occasions where other work takes priority)
- ☐ Not protected (there are often occasions where my allocated research time is used for other work such as practice or teaching)

**36. What best describes the terms of employment of your research active role? \***

- ☐ My contract is permanent
- ☐ My contract is fixed term (please specify the duration below)
- ☐ My contract is a secondment (please specify the duration below)

**37. What is the total duration of your fixed term contract / secondment**

- ☐ 0 - 6 Months
- ☐ 7 - 12 months
- ☐ 13 - 18 months
- ☐ 19 - 23 months
- ☐ 24 - 35 months
- ☐ 36 - 47 months
- ☐ 48 - 59 months

☐ 5 years +

**38. When your fixed term/secondment research active role comes to an end, do you plan to:**

- ☐ Return to the post I left/I was seconded from
- ☐ Look for new employment
- ☐ Unsure
- ☐ Other

**39. If other, please specify:**

**40. How secure do you feel in your current research active role? \***

- ☐ Secure (e.g. my role is permanent without risk)
- ☐ Somewhat secure (e.g. some risk to role)
- ☐ Not secure (e.g. my role is currently at risk or unlikely to be renewed)
- ☐ Other

**41. Please provide any further information about the security of your current research active role here:**

**42. Does the practitioner sector/setting (e.g. health or social care provider) you are employed/hosted by have a research strategy that is explicitly inclusive of AHPs? \***

- ☐ Yes
- ☐ No
- ☐ I do not know



☐ Other

43. If other, please specify:

44. Does the practitioner sector/setting (e.g. health or social care provider) you are employed/hosted by have an AHP lead for research?

*Please select at most two options \**

- ☐ Yes, there's an AHP research lead
- ☐ Yes, there's an NMAHP or NMAHPPs research lead
- ☐ No, there is no specific AHP/NMAHP/NMAHPPs lead for research
- ☐ I do not know
- ☐ Other

45. If other, please specify:

46. Does the practitioner sector/setting (e.g. health or social care provider) you are employed by/hosted by have a dedicated research service (e.g. a research and innovation team)? \*

- ☐ Yes
- ☐ No
- ☐ I do not know
- ☐ Other

47. If other, please specify:

48. If you are working for an organisation that is part of an Integrated Care Board (ICB) in England: Does your ICB offer any additional research support to you as an AHP?

- ☐ Yes
- ☐ No
- ☐ I do not know
- ☐ Not applicable

49. Are there any further organisational and/or professional body supports that have enabled you to combine research with practice that you wish to tell us about:

50. Is there anything else that you would like to tell us about being a registered AHP practitioner who has dedicated research time in their role?

## Diversity Data

We collect diversity data because it helps to identify and remove barriers to inclusion, for example, by exploring areas of under-representation of specific groups of people. All diversity data collected is anonymous and will not be linked back to you in any way.

### 51. Age (in years)

- ☐ 18-24
- ☐ 25-34
- ☐ 35-44
- ☐ 45-54
- ☐ 55-64
- ☐ 65-74
- ☐ 75 and over

### 52. Gender

- ☐ Woman (including Trans woman)
- ☐ Man (including Trans Man)
- ☐ Non-binary
- ☐ Prefer to self-describe
- ☐ Prefer not to say

### 53. Sexual orientation

- ☐ Heterosexual/Straight
- ☐ Bisexual
- ☐ Gay
- ☐ Lesbian
- ☐ Prefer to self-describe
- ☐ Prefer not to say

### 54. Is your gender identity the same as the gender you were assigned at birth?

- ☐ Yes
- ☐ No
- ☐ Prefer not to say

**55. Do you have a lived experience of disability and/or long-term health conditions?**

- ☐ Yes
- ☐ No
- ☐ Prefer not to disclose

**56. Religion**

- ☐ No religion
- ☐ Christian (including Church of England; Catholic, Protestant; and all other Christian Denomination)
- ☐ Buddhist
- ☐ Hindu
- ☐ Jewish
- ☐ Muslim
- ☐ Sikh
- ☐ Any other religion

**57. If you selected any other religion, please specify:**

**58. Race/Ethnicity**

- ☐ White - English, Welsh, Scottish, Northern Irish or British
- ☐ White - Irish
- ☐ White -Gypsy or Irish Traveller
- ☐ White - Any other White background
- ☐ Mixed or Multiple ethnic groups - White and Black Caribbean
- ☐ Mixed or Multiple ethnic groups - White and Black African

- ☐ Mixed or Multiple ethnic groups - White and Asian
- ☐ Mixed or Multiple ethnic groups - Any other Mixed or Multiple ethnic background
- ☐ Asian or Asian British - Indian
- ☐ Asian or Asian British - Pakistani
- ☐ Asian or Asian British - Bangladeshi
- ☐ Asian or Asian British - Chinese
- ☐ Asian or Asian British - Any other Asian background
- ☐ Black, African, Caribbean or Black British - African
- ☐ Black, African, Caribbean or Black British - Caribbean
- ☐ Black, African, Caribbean or Black British - Any other Black, African or Caribbean background
- ☐ Other ethnic group - Arab
- ☐ Other ethnic group - Any other ethnic group

**59. Do you have any caring responsibilities for a child/children and/or another adult/s?**

- ☐ No
- ☐ Yes
- ☐ Prefer not to say

**60. If yes, please select all that apply:**

*If you share care responsibilities equally then please answer as the primary carer.*

- ☐ Primary carer of a child or children (under 18 years)
- ☐ Primary carer of a child or children who is disabled or has a health condition or illness, or temporary care needs (under 18 years)
- ☐ Primary carer or assistant for a disabled adult or adults (18 years and over)
- ☐ Primary carer or assistant for an older person or people (65 years and over)
- ☐ Secondary carer (another person carries out main caring role)
- ☐ Prefer not to say.
